# Supplementary material for: Interesting times: winners, losers, and system shifts under climate change around Australia
Source: Oxford University Press journal article supplement (doi:10.1093/icesjms/fsr032), 2011-04-11
Supplement: fsr032supp.doc [file fsr032supp.doc]

**Suppplementary material**

The summaries and example formulations provided below for the three end-to-end models are to afford readers with an appreciation of the models, their assumptions, and general forms. A summary of the biophysical and human components included in the specific implementations used as a basis for the Australian analyses presented in the main paper is provided in Table A1.

The final section of the appendix provides a brief overview of the CSIRO Mark 3.5 ocean–atmosphere model and the OFAM model used to provide the regional downscaling. The outputs of these models were used to drive the physical environment in the different end-to-end models.

*Atlantis*

Although Atlantis has submodels for biophysical, harvest, monitoring, assessment, management and socio-economic system components, the exact form used for each can be drawn from a wide range of options of varying degrees of complexity. For Atlantis-SE complex implementations were used for each submodel explicitly representing many processes in each case. Consequently, interested readers are encouraged to explore the model in more detail in Fulton *et al.*, 2005 and Fulton *et al.*, 2007. However, to provide a feeling for the kind of formulation resolution used four example equations are provided here. The first is the general form of the non-mixotrophic primary producer biomass (*P*) equations:

(1)

where *P* is maximum growth rate for the primary producer; *n* is nutrient limitation (typically represented as Monod terms dictated by the most limiting nutrient); *I* is irradiance; *I,P* is the irradiance half saturation constant; for benthic primary producers *P* is maximum density, *s* is the proportion of the substratum suitable for that macrophyte and *d* is the scalar for local habitat degradation, because of urban development*; m* is a mortality term (a simple lysis coefficient for microproducers, but including bottom stress or nutrient related fouling for macrophytes); and the final term is for predation losses (summing across all predators *j*) where *X,j* is the potential availability of the prey group *X* to the predator *j* (mediated by requirements for co-location and gape limitation), *r* is a habitat state related refuge constraint (if appropriate for that group), *j* is the clearance rate for predator *j*, *Bj* is the biomass of the predator, *Bq* is the biomass of living prey of predator *j*, *D* is detrital biomass, *j* is maximum growth rate for the predator and ** are the predator’s assimilation efficiencies for live (*,L*) or detrital (*,D*) prey groups.

The representation of biomass pool consumers (of age class *i*, *Ci*) is of the following general form (this example assumes a form of Holling type II functional responses, but many other forms are available as options):

(2)

where the predation terms are as defined for (1); *O2* are oxygen levels, *O2,C* is the half saturation rate for oxygen for group *C*; *m* are mortality coefficients for non-predation mortality (linear and density- dependent coefficients are possible) and hypoxia related mortality; *H* are losses resulting from harvesting; *M* are additions or losses caused by movement in/out of the location; and *R* are losses or additions because of reproduction and ageing (for most biomass pool groups this is set to zero). The formulation is more involved for groups where average individual-based size classes are tracked, because this requires equations for the dynamics of structural and reserve mass as well as numbers per age class per location.

Landed harvest of group *j* (this could be a biomass pool group or an age class of an age structured group) by fishery *f* (*Hj,f*)is given by:

(3)

where *Bj* is the biomass of the group (or age class); *Ef,b* is the effort for that time-step applied by fishery *f* in box *b*; *z* is the coefficient of availability to the gear based on depth; *j,f* is catchability and *j,f* is selectivity of the gear used by fishery *f* for group *j* (both typically age-specific fitted constants per group); and the *j,f* are discard and escapement parameters (1 is escapement, 2 highgrading and 3 other forms of discarding—e.g. because of size or quota related restrictions); the final term is a final scale effort distribution model from Ellis and Pantus (2001), with ** the proportional overlap of the fishery targetable areas and the group’s habitat, and the ** define the extent, pattern of fishing and patchiness of the individual shots.

The level of effort applied in a specific location by a fishery depends on a hierarchical effort allocation model that takes into account factors such as past experience, economic expectations, regulations, short-term success (how they are tracking this year compared with both quota in hand and their state at the same point of the previous year) and attitudinal flexibility. There are annual, monthly and trip level effort allocation steps, but as an example the trip-level effort allocation to spatial box *b* by subfleet *f* (which are of a homogeneous class of boat from a single sector, using a single type of gear and sharing home ports and crew characteristics) at time *t* (*Eb,f,t*) is of the form:

(4)

where *ts,f* is shot length per day*;* is the scheduled per time-step effort for the current month (this will have been modified off an annual plan based on performance vs expectations, cash flow and remaining quota in hand); is the effort applied in the previous month; *FT* is the total distance weighted contributions of potential effort (i.e. summing the term in [] across all boxes in the model); is total harvest (over species) in the previous month; *Zb,f* is the proportion of the box open to fishing (because of spatial management or other impediments); *d* is the weighting of social and economic costs on effort allocation; *f* is the steaming speed of the average vessel in the subfleet; ** is the width of the model domain (in metres); *f* are fuel related variable costs; and *Gb,n* is the distance from the port *n* to box *b*; and *f* is the attitudinal flexibility of members of this subfleet.

*InVitro*

Given its agent-based nature the formulations in InVitro range from those typical of classic differential equation or metapopulation models (e.g. Equation (5)) through to decision trees, which dictate behaviour based on the state of an agent and its environment (Figure A1). Classification of the agent types in InVitro-NW and how they interconnect is given in Figure A2.

The benthic habitat classes are a typical example of the habitat metapopulation agents used in InVitro. The proportional cover of these habitats are broken up into small and large size classes, with further age structure included in the small size classes to capture slow growth to large size. The dynamics of the proportion cover of any one of these size classes is given by:

(5)

where *Aj* is the proportion of small habitat in age-size group *j* at time *t*; *U* is light limitation;*s* is the rate of horizontal growth for small habitat; ** is the sediment suitability rating for the habitat polygon (proportional presence of gravel and sand scaled, so that 1.0 is equal to perfect sediment composition); **is the index of spread for the logistic growth function; and ** is the inflexion point of the logistic growth function; *j* is the rate of recruitment of new small habitat specimens (only non-zero for the smallest class); *KT* is the proportion of the NW region covered with habitat; *r* is a recruitment coefficient that scales the contribution of the regional coverage to recruitment (fitting in this case gave *r* = 1); *s* is the natural mortality rate of small habitat; **is the index of spread for the logistic age-structured natural mortality function; ** is the inflexion point of the age-based natural mortality function; *j* ~U(0,1), with the sum of *j* over *j* equal to one (this is to avoid the assumption of homogeneous distribution of all age-size classes without necessitating subgrid scale spatial monitoring of patch composition; note these are independently sampled every time-step); *Dst* is the damage done to small habitat by cyclones, dredging and fishing at time *t*; ** is the vertical growth rate of small habitat (equivalent to ageing); **is the index of spread for the logistic function for the transition to large habitat; and  is the inflexion point of the transition function.

*Ecospace*

The general form of the biomass dynamics equation for group *i* in cell *k* in Ecospace (*Bi*) is given by:

(6)

where *ei* is assimilation efficiency for group *i*; *Qi,k,n* is total dynamic food consumption by group *i* in cell *k* feeding on prey group *n*; *Mi* is background natural mortality (and any other sources of non-predation mortality); *Fi,k,f* is the fishing rate for fleet *f* on group *i* in cell *k* (for this study impacts from other coastal industries were represented as mortality from an “additional fleet”); *mi,k,j* is the instantaneous rate of movement of group *i* from cell *k* to cell *j* (these rates can vary seasonally and are only executed for cells immediately adjacent cells).Alternative forms are used for groups with stanza-based age structure (Walters *et al.*, 2008, 2010). For the coupled models used in this study the biomass dynamics of plankton and primary production groups are actually dealt with in the NPZD model, with the biomass then supplied to the Ecospace model and any fluxes (losses of plankton because of predation, detrital production by the Ecospace groups) passed back to the NPZD for incorporation in its flux equations.

Among the most critical parameters in Ecospace are the vulnerability terms associated with the predator–prey interactions, which effectively dictate the degree of top–down vs. bottom–up control of individual interactions. It is important to consider the sensitivity of the results to these parameters. For the Ningaloo and NWS models, these terms were set based on fits to time-series or survey data. For the GBR model the vulnerability terms were at the default settings of v=2. For the final simulations these vulnerabilities were used, as was an alternative set where the v’s are set based on the trophic level of the group, moving from bottom–-up driven v’s for lower trophic levels to top–down for higher-level prey species.

*Circulation models*

At the large scale, the CSIRO Mk 3.5 Climate System Model was used to set the climate background to all the runs. This model is one of the models that contributed to the Intergovernmental Panel on Climate Change (IPCC) Fourth Assessment Report. It represents all the major components of the earth’s climate system – atmosphere, land surface, sea ice, and oceans. Spatially CSIRO Mk 3.5 has a spectral T63 horizontal grid (≈1.875° latitude by 1.875° longitude) with 18 vertical levels (hybrid sigma-pressure vertical coordinate). The atmospheric submodel includes: cloud microphysics and convection, linked via the detrainment of liquid and frozen water at the cloud top; semi-Lagrangian atmospheric moisture advection (vapour, liquid and frozen); and direct radiative forcing of sulphate on atmospheric albedo. The land-surface scheme uses: six layers of moisture and temperature (including a vegetation canopy); nine soil types; twelve vegetation types; and a three-layer snow model. CSIRO Mark 3.5 also includes a dynamic thermodynamic polar ice model and the ocean submodel is based upon the Modular Ocean Model version 2.2 (MOM2.2) of the Geophysical Fluid Dynamics Laboratory model; and uses a horizontal resolution of ≈ 0.9375° latitude by 1.875° longitude, with 31 levels in the vertical (the spacing of which gradually increasing with depth, from 10 m at the surface to 400 m at depth).

The OFAM forecasting model was used to provide the regional downscaling. This model uses: a hybrid mixed layer scheme; 720s time-step; 10m vertical layers for the top 200m, expanding below that; a variable horizontal resolution, which is at its finest around Australia (where it declines from 0.9°x0.9° to 0.1°x0.1°); a 1 minute global bathymetry, except around Australia where it employs the Geoscience Australia 1 km regional bathymetry. The OFAM variables of most use in the end-to-end models are salinity, temperature and the three-dimensional velocities.

Figure A1: Example decision tree for animal agents in InVitro.


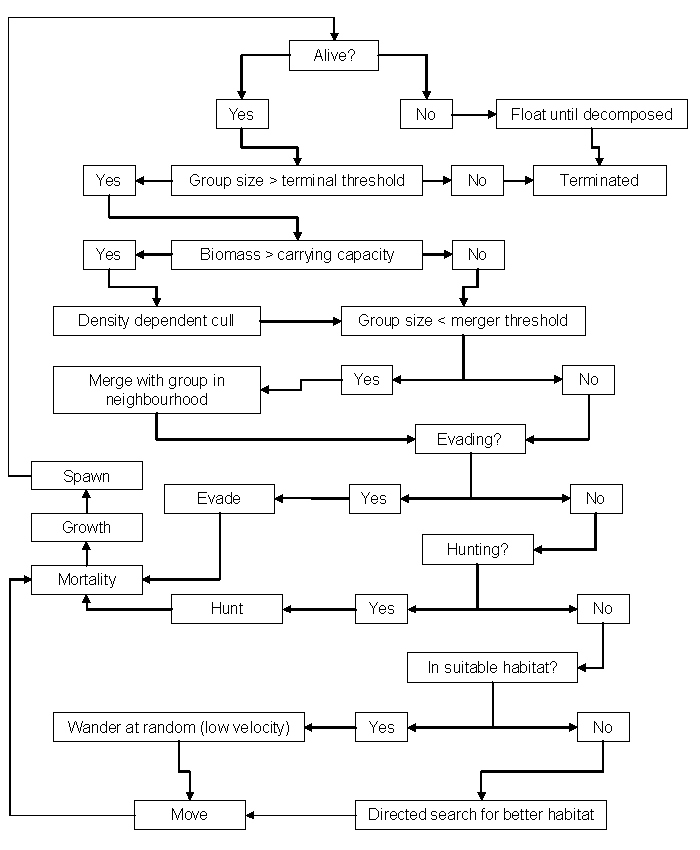


Figure A2: Schematic diagram of agent types in different InVitro-NW and how the different submodels interconnect. TEPs stands for threatened, endangered and protected species (including whale sharks, marine mammals and seabirds). Bathymetry can directly influence all agent types; monitors can report (for governance or output purposes) on all other agent types; and turtle life histories are covered using multiple agent types.


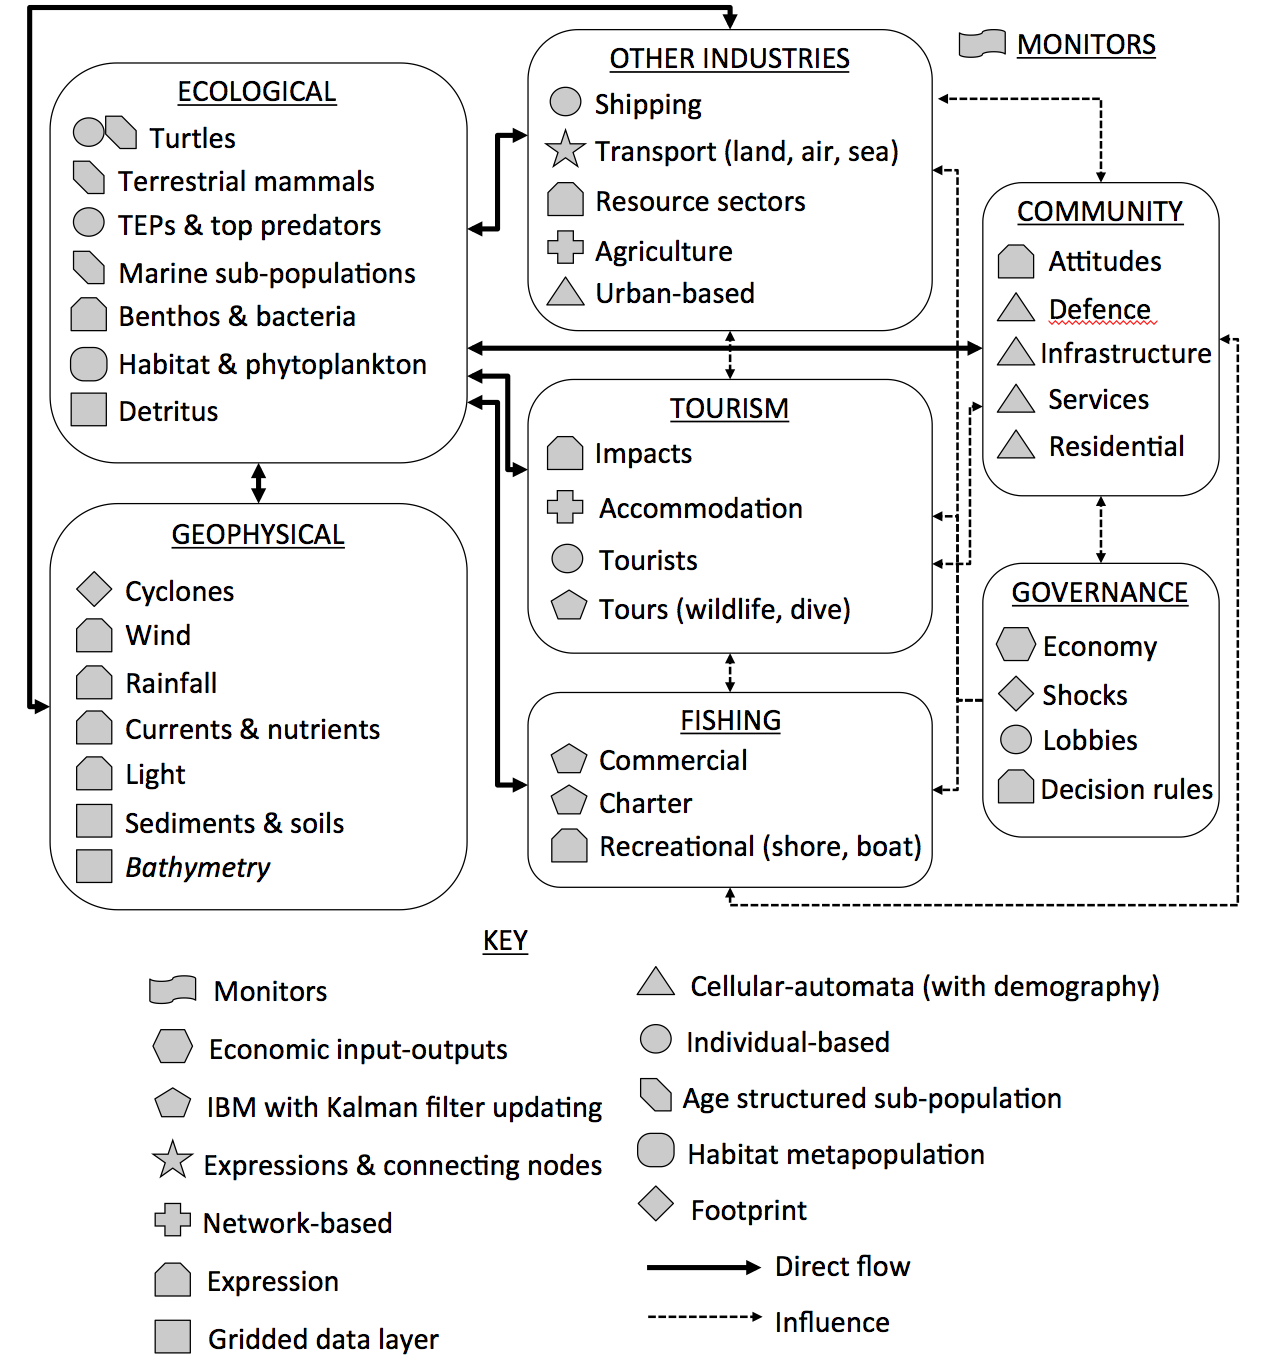


Table A1: Lists of biophysical and anthropogenic components represented in the models included in the climate driven analyses. A * indicates that the group is explicitly age structured.

| Atlantis-SE | InVitro-NW | Ecospace-GBR | Ecospace-SE | Ecospace-NW |
| --- | --- | --- | --- | --- |
| *Biophysical components* |  |  |  |  |
| Nutrients  Oxygen  Light  Currents  Sediments  Labile detritus  Refractory detritus  Diatoms  Picophytoplankton  Small zooplankton  Mesozooplankton  Large zooplankton  Gelatinous zooplankton  Pelagic bacteria  Squid*  Sediment bacteria  Macroalgae  Seagrass  Polychaetes  Deposit-feeders  Deep-water filter- feeders  Shallow-water filter-feeders  Scallops  Herbivorous grazers  Deep-water megazoobenthos  Shallow- water megazoobenthos  Rock lobster  Meiobenthos  Meiobenthos  Prawns*  Giant crab  Small pelagics*  Red bait*  Mackerel*  Migratory mesopelagics*  Non-migratory mesopelagics*  School whiting*  Shallow-water piscivores*  Blue warehou*  Spotted warehou*  Tuna and billfish*  *Rexea solandri**  Shallow-water demersal fish*  Flathead*  Redfish - *Centroberyx**  Morwong - *Nemadactylus**  *Genypterus blacodes**  *Macruronus novaezelandiae**  *Hyperoglyphe antarctica**  *Mora moro**  *Hoplostethus atlanticus**  Dories and oreos*  Cardinalfish*  *Mustelus antarcticus**  *Galeorhinus galeus**  Demersal sharks*  Pelagic sharks*  Dogfish*  Gulper sharks*  Skates and rays*  Seabirds*  Seals*  Australian sealion*  Delphinidae*  *Orcinus orca**  Baleen whales* | *NORTHWEST SHELF*  Rainfall  Light  Wind  Currents  Sediments  Acid sulphate soils  Mangroves*  Seagrass  Macroalgae  Reef habitat*  King prawns*  Banana prawns*  *Lutjanus sebae**  Other large lutjanids*  Small lutjanids*  Nemipterids*  Saurids*  Turtles*  Demersal sharks*  *NINGALOO-EXMOUTH*  Rainfall  Light  Wind  Currents  Sediments  Nutrients  Detritus  Native grass  Invasive grass  Shrubs*  Seagrass  Macroalgae  Coral*  Sponges*  Phytoplankton  Zooplankton  King prawns*  Banana prawns*  Trevallies*  Mackerels*  Queenfish*  Shallow demersal fish*  Lethrinids*  *Lethrinus nebulosus**  Large lutjanids*  Small lutjanids*  Serranids*  Nemipterids*  Saurids*  Tuskfish*  Saurids*  Herbivorous fish*  Small reef fish*  Tuna and billfish*  Reef-associated pelagics*  Small pelagics*  Squid*  Octopus*  Lobster*  Crabs  Shells  Urchins*  Benthos  Turtles*  Dolphins*  Demersal sharks*  Pelagic sharks*  Whales*  Whale sharks*  Manta rays*  Dugongs*  Kangaroos*  Goats*  Sheep*  Ospreys*  Coastal seabird*  Detritus | Barramundi  Mangrove jack*  Seabirds  Large sharks and rays  Inshore finfish  Large groupers  Cephalopods  Scombrids and jacks  Large schooling fish  Small school fish*  Coral trout  Large fish carnivorous  Other prawns  *Peneaus longistylus*  *Peneaus esculentus*  *Metapeneus endeavouri*  Small fish omnivorous  Crustaceans  Sea turtles (large)  Echinoderms  Benthic molluscs and worms  Zooplankton  Sessile animals  Dugong  Fish herbivore  Decomposer - microfauna  Phytoplankton  Benthic autotrophs  Discards  Detritus | Toothed whale  Baleen whale  Seal  Seabirds  Penguins  Tuna and billfish  Pelagic sharks  Demersal sharks  Rays  Warehouse  Redbait  Redfish  Ling  Dories  Jack mackerel  Jackass morwong  Flathead  Gemfish  Shallow ocean perch  Chinaman leatherjacket  Cucumberfish  Whiting  Cardinal  Shallow small invert. feeder  Shallow small predator  Shallow med. invert. feeder  Shallow med. predator  Shallow large invert. feeder  Shallow large predator  Blue-eye trevalla  Blue grenadier  Slope ocean perch  Deep-sea cod  Oreos  Slope small invert. feeder  Slope small predator  Slope med. invert. feeder  Slope med. predator  Slope large invert. feeder  Slope large predator  Pelagic small invert. feeder  Pelagic med. invert. feeder  Pelagic med. predator  Pelagic large invert. feeder  Pelagic large predator  Mesopelagics  Squid  Pelagic prawns  Macrobenthos  Megabenthos  Polychaeta  Gelatinous nekton  Large zooplankton  Small zooplankton  Primary producers  Detritus  Discards | *NORTHWEST SHELF*  Coastal sharks  Rays  Small tunas  Shallow lethrinids  Red emperor  Shallow lutjanids  Shallow nemipterirds  Deep nemipterids  Shallow serranids  Bream  Carangids*  Small pelagics  Shallow lizardfish  Deep Lizardfish  Shallow mullidae  Deep mullidae  Shallow triggerfish  Shallow sweetlip  Deep ponyfish  Shallow small fish  Deep small fish  Shallow med. fish  Deep med. fish  Shallow large fish  Deep large fish  Sessile epibenthos  Megabenthos  Macrofauna  Commerical prawns  Squid  Large zooplankton  Small zooplankton  Pelagic phytoplankton  Benthic phytoplankton  Microphytobenthos  Detritus  *NINGALOO-EXMOUTH*  Foxes  Marsupial grazers  Goats and sheep  Ospreys  Coastal seabird  Shallow demersal fish  Trevallies  Mackerels  Queenfish  Dolphins  Demersal sharks  Pelagic sharks  Whales  Whale sharks  Manta rays  Turtles*  Dugongs  Lethrinids*  *Lutjanus nebulosus**  Small lutjanids  Serranids  Tuskfish  Saurids  Nemipterids  Herbivores  Small reef fish  Tuna and billfish  Reef-associated pelagics  Small pelagics  Squid  Octopus  King prawn  Banana prawn  Lobster  Crabs  Shells  Urchins  Benthos  Coral*  Zooplankton  Buffelgrass  Native grass  Macrophytes  Phytoplankton  Litter  Discards  Detritus |
| *Anthropogenic industries* |  |  |  |  |
| Fisheries  Dive  Finfish auto-longline  Finfish drop line  Finfish mesh net  Finfish trap  Inshore line  Pots  Recreational  Scallop dredge  Shark net  Shark longline  Small pelagic state fisheries  Small pelagic Commonwealth fishery  Small pelagic purse-seine  Squid jig  Tuna longline  Tuna purse-seine  Trawl (with state, SET and GABT divisions)  Coastal industries1 | *NORTHWEST SHELF*  Fisheries  Finfish trap  Finfish trawl  Prawn trawl  Recreational  Oyster leases  Salt mining  Oil and gas  Ports  Shipping  Coastal development  *NINGALOO-EXMOUTH*  Fisheries  Prawn trawl  Recreational  Road transport  Ports  Shipping  Mines  Oil and gas  Parks  Defence  Agriculture  Urban development2 Tourism  Accommodation  Wildlife tours  Snorkelling and diving  Dune activities  Regional economy | Fisheries  Line fishing  Trawling  Inshore gillnets  Coastal industries1 | Fisheries  Commonwealth trawl  NSW state trawl  Victorian state trawl  Danish seine  Linefishing  Scallop dredge  Squid fishing  Trap  Tuna longline  Other non-trawl  Coastal industries1 | *NORTHWEST SHELF*  Fisheries  Domestic trawl  Domestic trap  Prawn trawl  Foreign trawl  Coastal industries1  *NINGALOO-EXMOUTH*  Fisheries3  Charter fishing  Shoreline fishing  Recreational  Commercial  Prawn trawl  Tourism  Whale shark tours  Snorkelling  Dune activities  Camping  Boat strikes  Agriculture  Coastal industries1 |

1. Represented through a coastal industries impacts model that includes the following industries: Roads, Road transport, Airports, Ports, Shipping, Mines, Resource sector, Dumps, Parks, Agriculture, Forestry, Utilities (water, electricity, sewage), Residential, Suburban, Commercial, Pollution outfalls, Retail, Government, Service, Warehouses, Manufacturing, Steel and metalworking, Restaurants, Accommodation, Entertainment, Tourism, Sport, Education, Medical, Construction, Banking, Research, Defence, Regional economy
2. This uses a cellular automata to represent the extent of roads, airports, parks, utilities (water, electricity, sewage), residential, suburban, commercial, retail, service, warehouses, manufacturing, restaurants and entertainment, accommodation, sport, education, medical and construction

**Reference**

Ellis, N., and Pantus, F. 2001. Management Strategy Modelling: Tools to Evaluate Trawl Management Strategies with Respect to Impacts on Benthic Biota within the Great Barrier Reef Marine Park Area. CSIRO Marine Research, Cleveland, Australia. ISBN 0 643 06241 6.
